# Supplementary material for: Structural Basis for Langerin Recognition of Diverse Pathogen and Mammalian Glycans through a Single Binding Site
Source: PubMed Central journal article supplement (PMC3065333; doi:10.1016/j.jmb.2010.11.039), 2011-01-28
Supplement: mmc1.pdf [file mmc1.pdf]

Supplemental Table 1. **Bacterial O-specific polysaccharides on array**

ID numbers correspond to entries in the Bacterial Carbohydrate Structure DataBase ([www.glyco.ac.ru/bcsdb3](http://www.glyco.ac.ru/bcsdb3)).

| Array | Bacterial strain                                          | ID             | Polysaccharide structure                                                                                                         |
|-------|-----------------------------------------------------------|----------------|----------------------------------------------------------------------------------------------------------------------------------|
| 1     | <i>Escherichia coli</i> O29                               | 20208          | a-D-Glcp-(1-6)-a-D-Galp-(1-3)-+<br> <br>-3)-D-Gro-(1-P-6)-b-D-Glcp-(1-4)-a-L-FucpNac-(1-3)-b-D-GlcpNac-(1-                       |
| 2     | <i>Escherichia coli</i> O40                               | 21403<br>23075 | -2)-b-D-Galp-(1-4)-b-D-Manp-(1-4)-a-D-Galp-(1-3)-b-D-GlcpNac-(1-                                                                 |
| 3     | <i>Escherichia coli</i> O106                              | 20655<br>21694 | a-D-Glcp-(1-4)-+<br> <br>-6)-a-D-Manp-(1-2)-a-D-Manp-(1-2)-b-D-Manp-(1-3)-a-D-GlcpNac-(1-                                        |
| 4     | <i>Escherichia coli</i> O130                              | 21749          | Gro-(2-P-4)-b-D-GalpNac-(1-3)-+<br> <br>-4)-a-D-Galp-(1-6)-b-D-Glcp-(1-3)-b-D-GalpNac-(1-                                        |
| 5     | <i>Escherichia coli</i> O148                              | 21578<br>23062 | -3)-a-L-Rhap-(1-3)-a-L-Rhap-(1-2)-a-D-Glcp-(1-3)-a-D-GlcpNac-(1-                                                                 |
| 6     | <i>Escherichia coli</i> O150:H6                           | 23079<br>21743 | S-lac-(2-4)-+<br> <br>-3)-b-D-GlcpNac-(1-2)-a-L-Rhap-(1-2)-a-L-Rhap-(1-3)-a-L-Rhap-(1-3)-b-D-GlcpNac-(1-<br>b-D-Glcp-(1-2)-+<br> |
| 7     | <i>Escherichia coli</i> O180/C3                           | 10174          | 2)-b-D-Quip3Nac-(1-3)-b-D-Ribf-(1-4)-b-D-Galp-(1-3)-a-D-GalpNac-(1-                                                              |
| 8     | <i>Proteus mirabilis</i> 3a, O3c                          | 4700           | L-Lys-(2-6)-a-D-GalpA-(1-4)-+<br> <br>-6)-b-D-GalpNac-(1-4)-b-D-GlcpA-(1-3)-b-D-GalpNac-(1-                                      |
| 9     | <i>Proteus mirabilis</i> O8<br><i>Proteus vulgaris</i> O8 | 4030           | a-D-Galp-(1-3)-+<br> <br>-3)-b-D-GlcpA-(1-4)-a-L-FucpNac-(1-3)-a-D-GlcpNac-(1-                                                   |

|    |                                                   |       |                                                                                                              |
|----|---------------------------------------------------|-------|--------------------------------------------------------------------------------------------------------------|
| 10 | <i>Proteus mirabilis</i> O10                      | 4664  | a-L-AltpA-(1-3)-+<br> <br>-4)-a-D-GalpNac-(1-3)-a-D-GalpA-(1-3)-a-D-GlcpNac-(1-                              |
| 11 | <i>Proteus mirabilis</i> O29a,29b                 | 10129 | a-D-GalpNac-(1-3)-+ a-D-Glcp-(1-2)-+<br>   <br>-6)-b-D-GalpNac-(1-4)-b-D-GlcpA-(1-3)-b-D-GalpNac-(1-         |
| 12 | <i>Proteus mirabilis</i> O50                      | 2850  | b-D-Glcp-(1-4)-+<br> <br>-3)-b-D-GlcpA-(1-4)-b-D-GalpNac-(1-4)-b-D-Galp-(1-3)-b-D-GlcpNac-(1-                |
| 13 | <i>Proteus mirabilis</i><br>O54a, 54b             | 20237 | D-Gro-(1-P-4)-+<br> <br>-6)-a-D-GlcpNac-(1-3)-b-D-Galp-(1-3)-a-D-GalpNac-(1-                                 |
| 14 | <i>Providencia alcalifaciens</i><br>O5            | 5945  | -4)-b-D-Quip3Nac-(1-3)-a-D-Galp-(1-3)-b-D-Galp-(1-3)-b-D-GlcpNac-(1-                                         |
| 15 | <i>Providencia alcalifaciens</i><br>O19           | 9276  | -2)-b-D-Fucp3Nac4Ac-(1-3)-a-D-GlcpNac-(1-4)-a-D-Galp-(1-4)-b-D-Galp-(1-3)-b-D-GlcpNac-(1-                    |
| 16 | <i>Providencia alcalifaciens</i><br>O21           | 2840  | a-D-Fucp3NFo-(1-4)-+<br> <br>-3)-a-D-GalpA-(1-4)-a-D-GalpNac-(1-4)-a-D-GalpNac-(1-3)-b-D-GalpNac-(1-         |
| 17 | <i>Providencia rustigianni</i><br>O14             | 2841  | (2S,8S)-cetLys-(2-6)-+<br> <br>-3)-a-D-GalpA-(1-4)-a-D-GalpNac-(1-3)-a-D-GlcpNac-(1-                         |
| 18 | <i>Providencia stuartii</i><br>O18                | 10467 | -4)-b-D-Quip3Nac-(1-6)-a-D-GlcpNac-(1-4)-b-D-GlcpA-(1-3)-a-D-GalpNac-(1-                                     |
| 19 | <i>Providencia stuartii</i><br>O44                | 10079 | b-D-GlcpA-(1-4)-+<br> <br>-4)-a-D-GalpNac-(1-3)-a-L-Fucp-(1-3)-a-D-Glcp-(1-4)-a-L-Quip-(1-3)-a-D-GlcpNac-(1- |
| 20 | <i>Pseudomonas aeruginosa</i><br>O1 (IATS 1, FI4) | 20553 | -4)-a-D-GalpNac-(1-4)-b-D-GlcpNac3NacA-(1-3)-a-D-FucpNac-(1-3)-a-D-QuipNac-(1-                               |

|    |                                                         |        |                                                                                                           |
|----|---------------------------------------------------------|--------|-----------------------------------------------------------------------------------------------------------|
| 21 | <i>Pseudomonas aeruginosa</i><br>O2 (IATS 18, FI7)      | 20560  | -4)-a-L-GulpNAc3NAmA-(1-4)-b-D-ManpNAc3NAcA-(1-3)-a-D-FucpNAc-(1-                                         |
| 22 | <i>Pseudomonas aeruginosa</i><br>O2a,2b (IATS 16)       | 20554  | -4)-b-D-ManpNAc3NAmA-(1-4)-b-D-ManpNAc3NAcA-(1-3)-b-D-FucpNAc-(1-                                         |
| 23 | <i>Pseudomonas aeruginosa</i><br>O2a,2b,2e              | 20555  | -4)-b-D-ManpNAc3NAmA-(1-4)-b-D-ManpNAc3NAcA-(1-3)-b-D-FucpNAc4Ac-(1-                                      |
| 24 | <i>Pseudomonas aeruginosa</i><br>O2a,(2c) (IATS 2, FI3) | 20556  | -4)-b-D-ManpNAc3NAmA-(1-4)-b-L-GulpNAc3NAcA-(1-3)-a-D-FucpNAc-(1-                                         |
| 25 | <i>Pseudomonas aeruginosa</i><br>O2a,2d                 | 20557  | -4)-b-D-ManpNAc3NAmA-(1-4)-b-D-ManpNAc3NAcA-(1-3)-a-D-FucpNAc-(1-                                         |
| 26 | <i>Pseudomonas aeruginosa</i><br>O3a,3b                 | 20561  | (S)-3HOBu-(1-4)-+<br> <br>-2)-a-L-Rhap3Ac-(1-6)-a-D-GlcpNAc-(1-4)-a-L-GalpNAcA-(1-3)-b-D-QuipNAc4N-(1-    |
| 27 | <i>Pseudomonas aeruginosa</i><br>O3a,3b,3c (IATS 3)     | 122939 | (S)-3HOBu-(1-4)-+<br> <br>-2)-a-L-Rhap3Ac-(1-6)-a-D-GlcpNAc-(1-4)-a-L-GalpNAcA3Ac-(1-3)-b-D-QuipNAc4N-(1- |
| 28 | <i>Pseudomonas aeruginosa</i><br>O3a,3d                 | 20563  | -3)-a-L-Rhap-(1-6)-a-D-GlcpNAc-(1-4)-a-L-GalpNAcA-(1-3)-b-D-QuipNAc4NAc-(1-                               |
| 29 | <i>Pseudomonas aeruginosa</i><br>O4a,4c                 | 20565  | -2)-a-L-Rhap-(1-3)-a-L-FucpNAc-(1-3)-a-L-FucpNAc-(1-3)-a-D-FucpNAc-(1-                                    |
| 30 | <i>Pseudomonas aeruginosa</i><br>O6 (FI1)               | 20570  | -2)-a-L-Rhap-(1-4)-a-D-GalpNAcA3Ac-(1-4)-a-D-GalpNFoA-(1-3)-a-D-QuipNAc-(1-                               |
| 31 | <i>Pseudomonas aeruginosa</i><br>O6a (IATS 6)           | 20566  | -3)-a-L-Rhap-(1-4)-a-D-GalpNAcA3Ac-(1-4)-a-D-GalpNFoA-(1-3)-a-D-QuipNAc-(1-                               |
| 32 | <i>Pseudomonas aeruginosa</i><br>O6a,6c                 | 20568  | -3)-a-L-Rhap-(1-4)-a-D-GalpNAcA-(1-4)-a-D-GalpNFoA-(1-3)-a-D-QuipNAc-(1-                                  |
| 33 | <i>Pseudomonas aeruginosa</i><br>O13a,13b (IATS 13)     | 123031 | -2)-a-L-Rhap-(1-3)-a-L-Rhap-(1-4)-a-D-GalpNAcA3Ac-(1-3)-b-D-QuipNAc-(1-                                   |

|    |                                                     |        |                                                                                                           |
|----|-----------------------------------------------------|--------|-----------------------------------------------------------------------------------------------------------|
| 34 | <i>Pseudomonas aeruginosa</i><br>O10a,10b (IATS 10) | 20576  | -3)-a-L-Rhap2Ac-(1-4)-a-L-GalpNAcA-(1-3)-a-D-QuipNAc-(1-                                                  |
| 35 | <i>Pseudomonas aeruginosa</i><br>O10a,10c (IATS 19) | 20577  | -3)-a-L-Rhap-(1-4)-a-L-GalpNAcA-(1-3)-a-D-QuipNAc-(1-                                                     |
| 36 | <i>Pseudomonas aeruginosa</i><br>O11a,11b (IATS 11) | 20578  | -2)-b-L-Glcp-(1-3)-a-L-FucpNAc-(1-3)-b-D-FucpNAc-(1-                                                      |
| 37 | <i>Pseudomonas aeruginosa</i><br>O12 (IATS 12)      | 20579  | -8)-a-8eLegp5Ac7Ac-(2-3)-a-L-FucpNAc-(1-3)-a-D-QuipNAc-(1-                                                |
| 38 | <i>Pseudomonas aeruginosa</i><br>O13a,13b (IATS 13) | 20580  | -2)-a-L-Rhap-(1-3)-a-L-Rhap-(1-4)-a-D-GalpNAc3AcA-(1-3)-b-D-QuipNAc-(1-                                   |
| 39 | <i>Pseudomonas aeruginosa</i><br>O13a,13c (IATS 14) | 20581  | a-D-Glcp-(1-3)-+<br> <br>-2)-a-L-Rhap-(1-3)-a-L-Rhap-(1-4)-a-D-GalpNAcA-(1-3)-b-D-QuipNAc-(1-             |
| 40 | <i>Pseudomonas aeruginosa</i><br>O14 (IATS 17)      | 20582  | -4)-a-L-Rhap-(1-3)-b-D-ManpNAc-(1-                                                                        |
| 41 | <i>Pseudomonas aeruginosa</i><br>O15 (IATS 15)      | 20583  | -2)-b-D-Ribf-(1-3)-a-D-GalpNAc-(1-                                                                        |
| 42 | <i>Shigella boydii</i><br>type 2                    | 114007 | b-D-Galf-(1-3)-+<br> <br>-2)-a-L-Rhap-(1-2)-a-L-Rhap-(1-2)-b-D-Ribf-(1-4)-a-D-GalpA-(1-3)-a-D-GlcpNAc-(1- |
| 43 | <i>Shigella boydii</i><br>type 4                    | 108649 | a-D-Glcp-(1-2)-+<br> <br>-3)-a-L-Rhap-(1-4)-b-D-GlcpA-(1-3)-b-L-Rhap-(1-4)-b-D-GlcpNAc-(1-                |
| 44 | <i>Shigella boydii</i><br>type 10                   | 10148  | b-D-Ribf-(1-4)-b-D-GlcpA-(1-4)-+<br> <br>-3)-a-D-Galp-(1-6)-a-D-Manp-(1-2)-a-D-Manp-(1-3)-b-D-GalpNAc-(1- |

|    |                                        |        |                                                                                                                        |
|----|----------------------------------------|--------|------------------------------------------------------------------------------------------------------------------------|
| 45 | <i>Shigella dysenteriae</i><br>type 3  | 20016  | (R)-lac-(2-4)-b-D-Glcp-(1-6)-a-D-Glcp-(1-4)-+<br> <br>-3)-b-D-Galp-(1-6)-b-D-Galf-(1-3)-b-D-GalpNAc-(1-                |
| 46 | <i>Shigella dysenteriae</i><br>type 8  | 108662 | b-D-GlcpNAc-(1-4)-b-D-Glcp-(1-4)-+<br> <br>-4)-b-D-GlcpA-(1-3)-b-D-GalpNAc-(1-3)-b-D-GalpNAc-(1-                       |
| 47 | <i>Shigella dysenteriae</i><br>type 11 | 23077  | a-D-Glcp-(1-6)-a-D-Galp-(2-Ac ~25%)-(1-3)-+<br> <br>-3)-D-Gro-(3-P-6)-b-D-Glcp-(1-4)-a-L-FucpNAc-(1-3)-b-D-GlcpNAc-(1- |
| 48 | <i>Shigella dysenteriae</i><br>type 13 | 23079  | (S)-lac-(2-4)-+<br> <br>-3)-b-D-GlcpNAc-(1-2)-a-L-Rhap-(1-3)-a-L-Rhap-(1-3)-b-D-GlcpNAc-(1-<br>b-D-Glcp-(1-2)-+<br>    |

Abbreviations: Am, acetimidoyl; cetLys, N<sup>ε</sup>-(1-carboxyethyl)lysine; Fo, formyl; lac, 1-carboxyethyl (a lactic acid residue); 3-HOBut, 3-hydroxybutanoyl; 8eLeg, 5,7-diamino-3,5,7,9-tetradecoxy-L-glycero-D-manno-non-2-ulosonic (8-epilegionaminic) acid.
